# Supplementary material for: Foodborne Transmission of Deformed Wing Virus to Ants (Myrmica rubra)
Source: PubMed Central journal article supplement (PMC6920936; doi:10.3390/insects10110394), 2019-11-07
Supplement: insects-10-00394-s001.pdf [file insects-10-00394-s001.pdf]

Article

# Foodborne Transmission of Deformed Wing Virus to Ants (*Myrmica rubra*)

Daniel Schläppi <sup>1,\*</sup>, Patrick Lattrell <sup>1</sup>, Orlando Yañez <sup>1</sup>, Nor Chejanovsky <sup>1,2</sup> and Peter Neumann <sup>1,3</sup>

<sup>1</sup> Institute of Bee Health, Vetsuisse Faculty, University of Bern, 3097 Bern, Switzerland; patrick.lattrell@students.unibe.ch (P.L.); orlando.yanez@vetsuisse.unibe.ch (O.Y.); ninar@volcani.agri.gov.il (N.C.); peter.neumann@vetsuisse.unibe.ch (P.N.)

<sup>2</sup> Department of Entomology, Agricultural Research Organization, the Volcani Center, Bet Dagan 50250, Israel

<sup>3</sup> Swiss Bee Research Centre, Agroscope, 3097 Bern, Switzerland

\* Correspondence: daniel.schlaepi@vetsuisse.unibe.ch; Tel.: +41-31-631-57-69

Received: 30 August 2019; Accepted: 5 November 2019; Published: date

**Table S1.** Experimental data with genomic copies of DWV-A&B per individual *Myrmica rubra* worker and *Apis mellifera* pupae used for feeding the ants. All samples from all treatments (1 = Treatment 1; 2 = Treatment 2; 3 = Control; 4 = Honeybee pupae) and sampling weeks (13–16) are reported including the amount of template RNA used for reverse the transcription.

| Sample Name | Treatment * | Sampling week | Positive/Negative Assignment | Genomic DWV Copies per Individual | Template RNA |
|-------------|-------------|---------------|------------------------------|-----------------------------------|--------------|
| T1_1        | 1           | 13            | positive                     | $6.04 \times 10^7$                | 500          |
| T1_2        | 1           | 13            | positive                     | $4.94 \times 10^8$                | 250          |
| T1_3        | 1           | 13            | positive                     | $7.87 \times 10^7$                | 100          |
| T1_4        | 1           | 13            | positive                     | $4.71 \times 10^8$                | 250          |
| T1_5        | 1           | 13            | positive                     | $1.78 \times 10^8$                | 50           |
| T1_6        | 1           | 13            | positive                     | $4.07 \times 10^8$                | 50           |
| T2_1        | 2           | 13            | positive                     | $6.12 \times 10^9$                | 50           |
| T2_2        | 2           | 13            | positive                     | $2.35 \times 10^9$                | 250          |
| T2_3        | 2           | 13            | positive                     | $4.69 \times 10^9$                | 50           |
| T2_4        | 2           | 13            | positive                     | $8.99 \times 10^8$                | 50           |
| T2_5        | 2           | 13            | positive                     | $6.92 \times 10^8$                | 50           |
| T2_6        | 2           | 13            | positive                     | $1.50 \times 10^{10}$             | 50           |
| C_1         | 3           | 13            | positive                     | $1.85 \times 10^5$                | 100          |
| C_2         | 3           | 13            | negative                     | $1.48 \times 10^3$                | 250          |
| C_3         | 3           | 13            | positive                     | $7.58 \times 10^5$                | 500          |
| 2_T1_1      | 1           | 14            | positive                     | $1.11 \times 10^8$                | 500          |
| 2_T1_2      | 1           | 14            | positive                     | $4.66 \times 10^9$                | 250          |
| 2_T1_3      | 1           | 14            | positive                     | $7.58 \times 10^8$                | 250          |
| 2_T1_4      | 1           | 14            | positive                     | $6.82 \times 10^7$                | 250          |
| 2_T1_5      | 1           | 14            | positive                     | $6.28 \times 10^8$                | 250          |
| 2_T1_6      | 1           | 14            | positive                     | $4.43 \times 10^7$                | 250          |
| 2_T2_1      | 2           | 14            | positive                     | $1.65 \times 10^8$                | 250          |
| 2_T2_2      | 2           | 14            | positive                     | $2.89 \times 10^8$                | 250          |
| 2_T2_3      | 2           | 14            | positive                     | $1.02 \times 10^9$                | 250          |
| 2_T2_4      | 2           | 14            | positive                     | $9.80 \times 10^7$                | 250          |
| 2_T2_5      | 2           | 14            | positive                     | $1.06 \times 10^8$                | 250          |
| 2_T2_6      | 2           | 14            | positive                     | $1.22 \times 10^9$                | 250          |
| 2_C_1       | 3           | 14            | positive                     | $2.00 \times 10^4$                | 250          |
| 2_C_2       | 3           | 14            | positive                     | $1.34 \times 10^4$                | 250          |
| 2_C_3       | 3           | 14            | positive                     | $2.32 \times 10^4$                | 250          |
| 3_T1_1      | 1           | 15            | positive                     | $7.87 \times 10^7$                | 50           |
| 3_T1_2      | 1           | 15            | positive                     | $1.77 \times 10^7$                | 250          |

|        |   |    |          |                       |     |
|--------|---|----|----------|-----------------------|-----|
| 3_T1_3 | 1 | 15 | positive | $5.22 \times 10^7$    | 50  |
| 3_T1_4 | 1 | 15 | positive | $9.53 \times 10^7$    | 100 |
| 3_T1_5 | 1 | 15 | positive | $2.88 \times 10^6$    | 50  |
| 3_T1_6 | 1 | 15 | positive | $6.51 \times 10^7$    | 250 |
| 3_T2_1 | 2 | 15 | positive | $1.08 \times 10^8$    | 250 |
| 3_T2_2 | 2 | 15 | positive | $8.90 \times 10^7$    | 50  |
| 3_T2_3 | 2 | 15 | positive | $2.07 \times 10^8$    | 50  |
| 3_T2_4 | 2 | 15 | positive | $2.50 \times 10^8$    | 250 |
| 3_T2_5 | 2 | 15 | positive | $5.85 \times 10^6$    | 250 |
| 3_T2_6 | 2 | 15 | positive | $3.71 \times 10^8$    | 50  |
| 3_C_1  | 3 | 15 | positive | $2.55 \times 10^3$    | 250 |
| 3_C_2  | 3 | 15 | positive | $2.27 \times 10^3$    | 250 |
| 3_C_3  | 3 | 15 | positive | $1.23 \times 10^4$    | 50  |
| 4_T1_1 | 1 | 16 | positive | $1.93 \times 10^7$    | 50  |
| 4_T1_3 | 1 | 16 | positive | $1.45 \times 10^7$    | 50  |
| 4_T1_4 | 1 | 16 | positive | $4.93 \times 10^7$    | 100 |
| 4_T1_5 | 1 | 16 | positive | $6.98 \times 10^6$    | 250 |
| 4_T1_6 | 1 | 16 | positive | $7.22 \times 10^7$    | 50  |
| 4_T2_1 | 2 | 16 | positive | $2.50 \times 10^7$    | 50  |
| 4_T2_2 | 2 | 16 | positive | $1.77 \times 10^7$    | 100 |
| 4_T2_3 | 2 | 16 | positive | $6.01 \times 10^6$    | 50  |
| 4_T2_4 | 2 | 16 | positive | $1.04 \times 10^7$    | 50  |
| 4_T2_5 | 2 | 16 | positive | $1.50 \times 10^6$    | 50  |
| 4_T2_6 | 2 | 16 | positive | $1.32 \times 10^8$    | 250 |
| 4_C_3  | 3 | 16 | positive | $1.84 \times 10^4$    | 100 |
| FP_2.1 | 4 | NA | positive | $2.10 \times 10^{11}$ | 500 |
| FP_2.2 | 4 | NA | positive | $1.66 \times 10^{11}$ | 500 |
| FP_2.3 | 4 | NA | positive | $1.18 \times 10^{11}$ | 500 |
| FP_2.4 | 4 | NA | positive | $2.98 \times 10^{11}$ | 500 |
| FP_3.1 | 4 | NA | positive | $3.17 \times 10^{11}$ | 500 |
| FP_3.2 | 4 | NA | positive | $2.54 \times 10^{11}$ | 500 |
| FP_3.3 | 4 | NA | positive | $2.18 \times 10^{11}$ | 500 |
| FP_4.1 | 4 | NA | positive | $2.44 \times 10^{11}$ | 500 |
| FP_4.2 | 4 | NA | positive | $5.81 \times 10^{11}$ | 500 |
| FP_4.3 | 4 | NA | positive | $1.12 \times 10^{12}$ | 500 |
| FP_4.5 | 4 | NA | positive | $7.23 \times 10^{11}$ | 500 |
